# Supplementary material for: One-pot green bio-assisted synthesis of highly active catalytic palladium nanoparticles in porcine gastric mucin for environmental applications
Source: Royal Society of Chemistry journal article supplement (doi:10.1039/d3na00385j), 2023-01-01
Supplement: d3na00385j1.pdf [file d3na00385j1.pdf]

Supplementary information.

## One-pot green bio-assisted synthesis of highly active catalytic Palladium nanoparticles in Porcine Gastric Mucin for environmental applications

Roman Nudelman, Shir Zurets, Meiron Lev, Shira Gavrieli, Louisa Meshi, Innes Zucker, Shachar Richter\*

| PdNp<br>SUP | reaction rate<br>(1/sec) | reaction rate<br>(1/min) |
|-------------|--------------------------|--------------------------|
| 4           | 0.0027                   | 0.162                    |
| 6           | 0.011                    | 0.66                     |
| 8           | 0.0186                   | 1.116                    |
| 10          | 0.0187                   | 1.122                    |

| PdNp<br>WHO | reaction<br>rate (1/sec) | reaction rate<br>(1/min) |
|-------------|--------------------------|--------------------------|
| 4           | 0.0017                   | 0.0102                   |
| 6           | 0.0058                   | 0.348                    |
| 8           | 0.0065                   | 0.39                     |
| 10          | 0.0175                   | 1.05                     |

| PdNp<br>PREP | reaction rate<br>(1/sec) | reaction rate<br>(1/min) |
|--------------|--------------------------|--------------------------|
| 4            | 0.0025                   | 0.15                     |
| 6            | 0.0113                   | 0.678                    |
| 8            | 0.0102                   | 0.612                    |
| 10           | 0.0144                   | 0.864                    |

Table 1 Kinetic rates of nitrophenol reaction with PdNp synthesized with PGM from three different fractions of particles produced from four different initial amounts of Pd precursor.

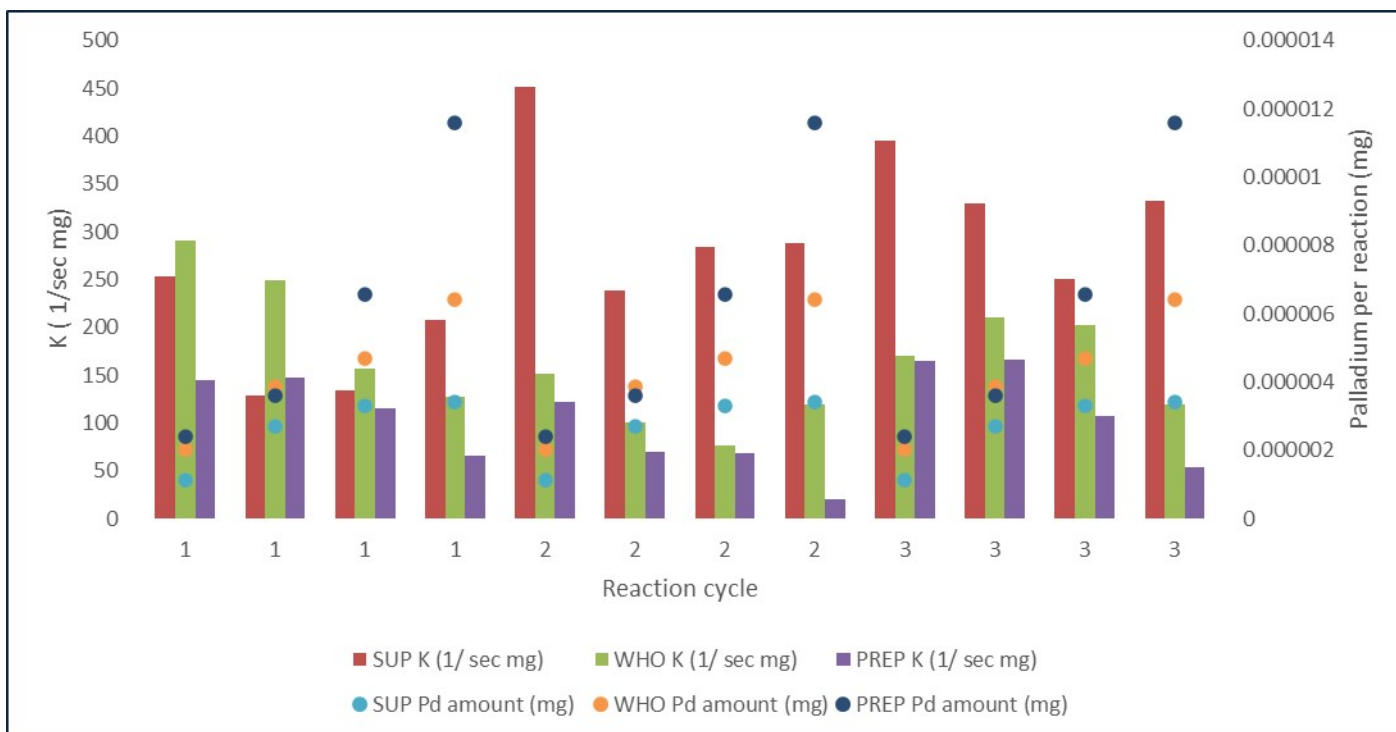

| Cycle | PdCl2 (mg) | reaction rate (1/min) | reaction rate (1/s) |
|-------|------------|-----------------------|---------------------|
| 1     | 4          | 0.0208                | 0.000346667         |
| 1     | 6          | 0.0318                | 0.00053             |
| 1     | 8          | 0.0453                | 0.000755            |
| 1     | 10         | 0.0454                | 0.000756667         |
| 2     | 4          | 0.0175                | 0.000291667         |
| 2     | 6          | 0.015                 | 0.00025             |
| 2     | 8          | 0.0272                | 0.000453333         |
| 2     | 10         | 0.0141                | 0.000235            |
| 3     | 4          | 0.0237                | 0.000395            |
| 3     | 6          | 0.0359                | 0.000598333         |
| 3     | 8          | 0.0421                | 0.000701667         |
| 3     | 10         | 0.0369                | 0.000615            |

Figure S1 Kinetic rates of PdNp encapsulated in hydrogels from three different fractions and different PdNp weights per hydrogel pellet in three cycles of nitrophenol reduction.

| SUP  |            | WHO      |            | PREP     |            |          |
|------|------------|----------|------------|----------|------------|----------|
| 4mg  |            | 4mg      |            | 4mg      |            |          |
|      | Time (min) | Yield %  | Time (min) | Yield %  | Time (min) | Yield %  |
|      | 60         | 20       | 60         | 26.66667 | 60         | 48       |
|      | 120        | 58.66667 | 120        | 94.66667 | 120        | 93.73333 |
|      | 180        | 84.4     | 180        | 95.6     | 180        | 98.26667 |
|      | 240        | 81.73333 | 240        | 96.4     | 240        | 99.6     |
|      | 300        | 100.1333 | 300        | 100.4    | 300        | 101.3333 |
| 6mg  |            | 6mg      |            | 6mg      |            |          |
|      | Time (min) | Yield %  | Time (min) | Yield %  | Time (min) | Yield %  |
|      | 15         | 84       | 15         | 90.66667 | 15         | 90.66667 |
|      | 20         | 78.66667 | 20         | 97.33333 | 20         | 94.66667 |
|      | 30         | 88       | 30         | 92       | 30         | 94.66667 |
|      | 40         | 92       | 40         | 94.66667 | 40         | 100      |
|      | 60         | 97.33333 | 60         | 92       | 60         | 100      |
| 8mg  |            | 8mg      |            | 8mg      |            |          |
|      | Time (min) | Yield %  | Time (min) | Yield %  | Time (min) | Yield %  |
|      | 15         | 84       | 15         | 81.33333 | 15         | 84       |
|      | 20         | 89.33333 | 20         | 96       | 20         | 85.33333 |
|      | 30         | 90.66667 | 30         | 85.33333 | 30         | 94.66667 |
|      | 40         | 90.66667 | 40         | 86.66667 | 40         | 94.66667 |
|      | 60         | 94.66667 | 60         | 96       | 60         | 97.33333 |
| 10mg |            | 10mg     |            | 10mg     |            |          |
|      | Time (min) | Yield %  | Time (min) | Yield %  | Time (min) | Yield %  |
|      | 15         | 84       | 15         | 86.66667 | 15         | 90.66667 |
|      | 20         | 96       | 20         | 88       | 20         | 92       |
|      | 30         | 93.33333 | 30         | 90.66667 | 30         | 86.66667 |
|      | 40         | 94.66667 | 40         | 96       | 40         | 89.33333 |
|      | 60         | 97.33333 | 60         | 98.66667 | 60         | 97.33333 |

Table 2 Reaction times and bi phenyl product yield produced from Suzuki-Miyaura reaction catalyzed by PdNp from three different fractions synthesized from different amounts of initial PdCl<sub>2</sub> precursor.

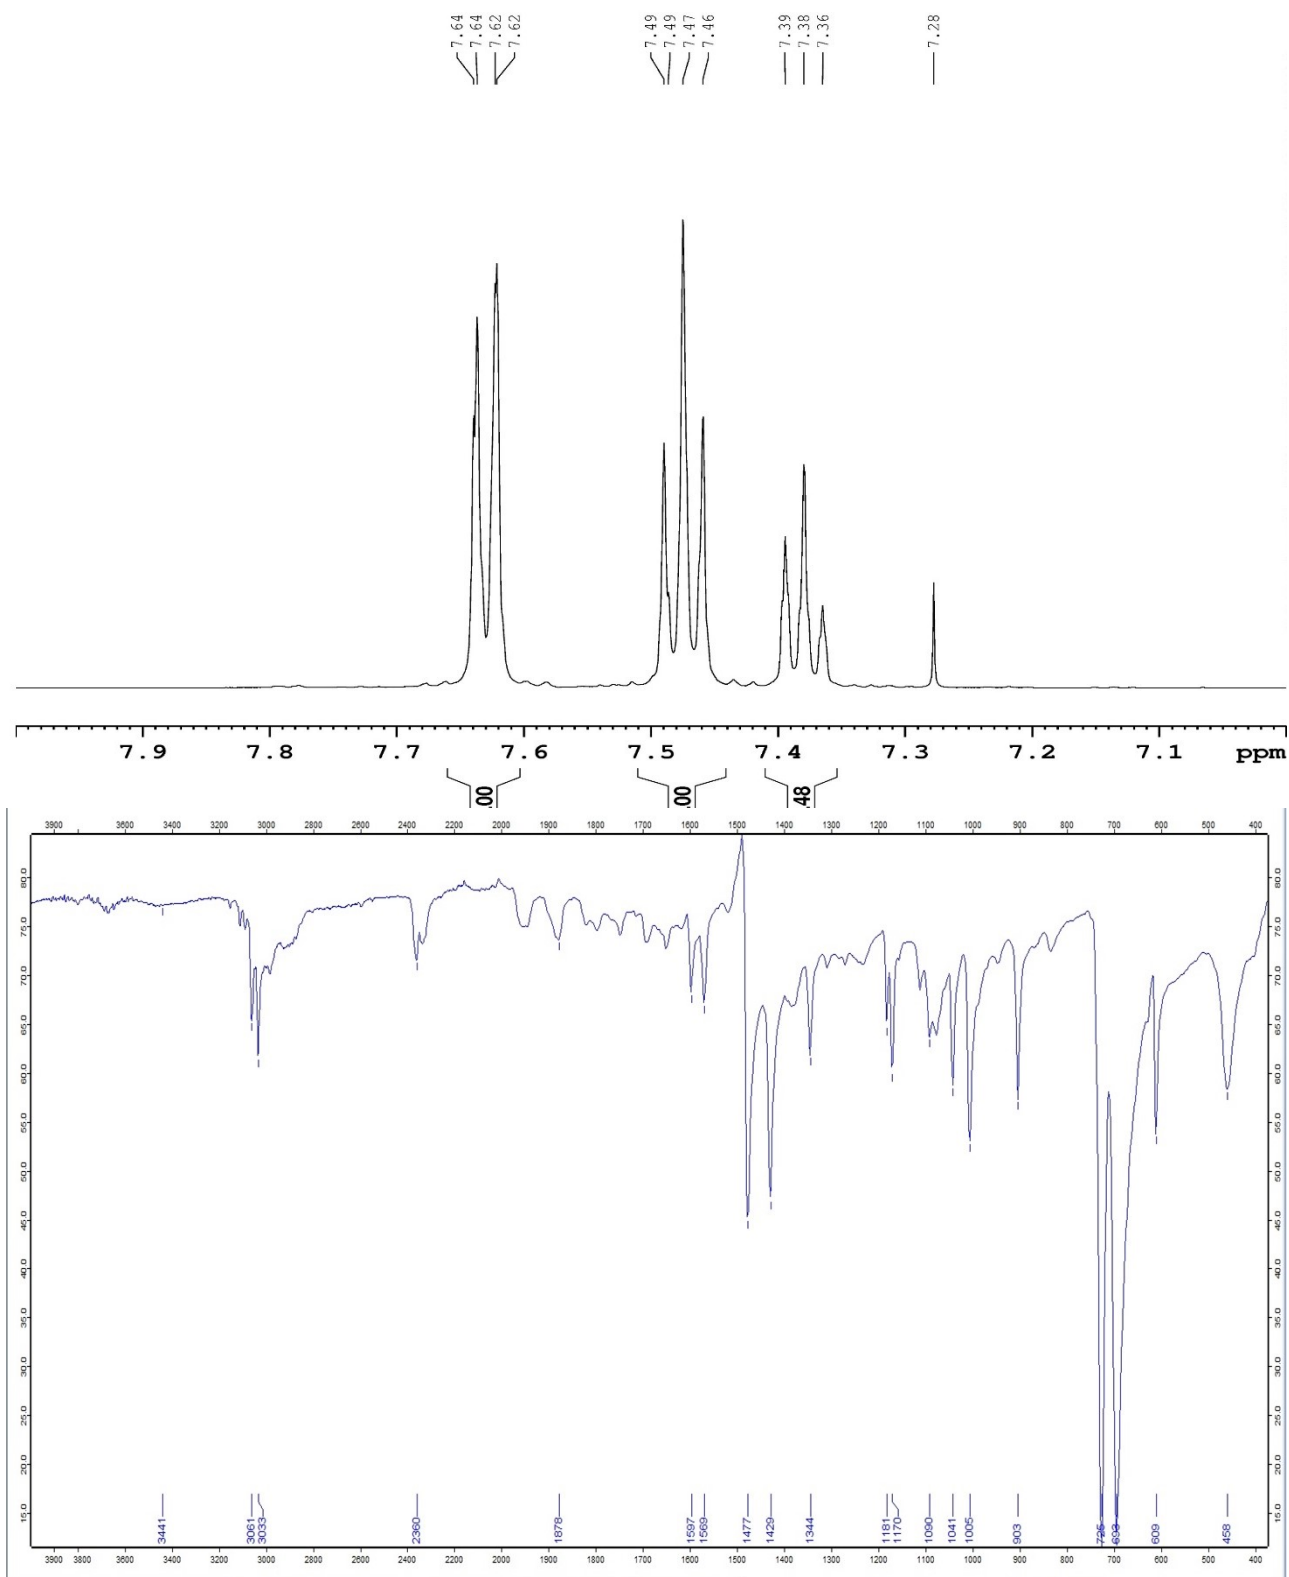

Figure S2 H-NMR (top) and FTIR (bottom) spectra of produced bi phenyl product produced by Suzuki-Miyaura reaction catalyzed by SUP PdNp fraction of PdNp synthesized from 6mg of initial PdCl<sub>2</sub> precursor.

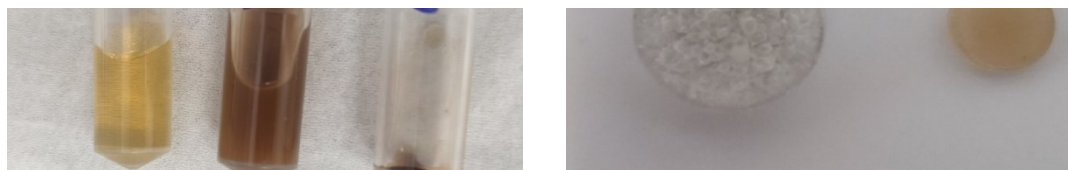

Figure S3 optical image of produced PdNP fractions, B. optical image of hydrated(left) and dehydrated(right) PdNP hydrogel pellet catalyst.

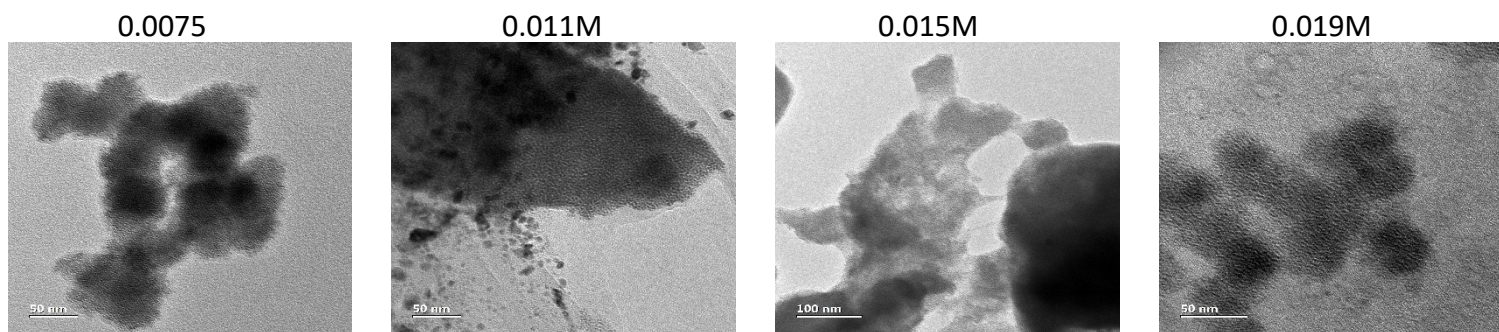

Figure S4 PdNP aggregated in large clusters collected from PREP fraction obtained from different initial concentration of PdCl<sub>2</sub> ionic salt

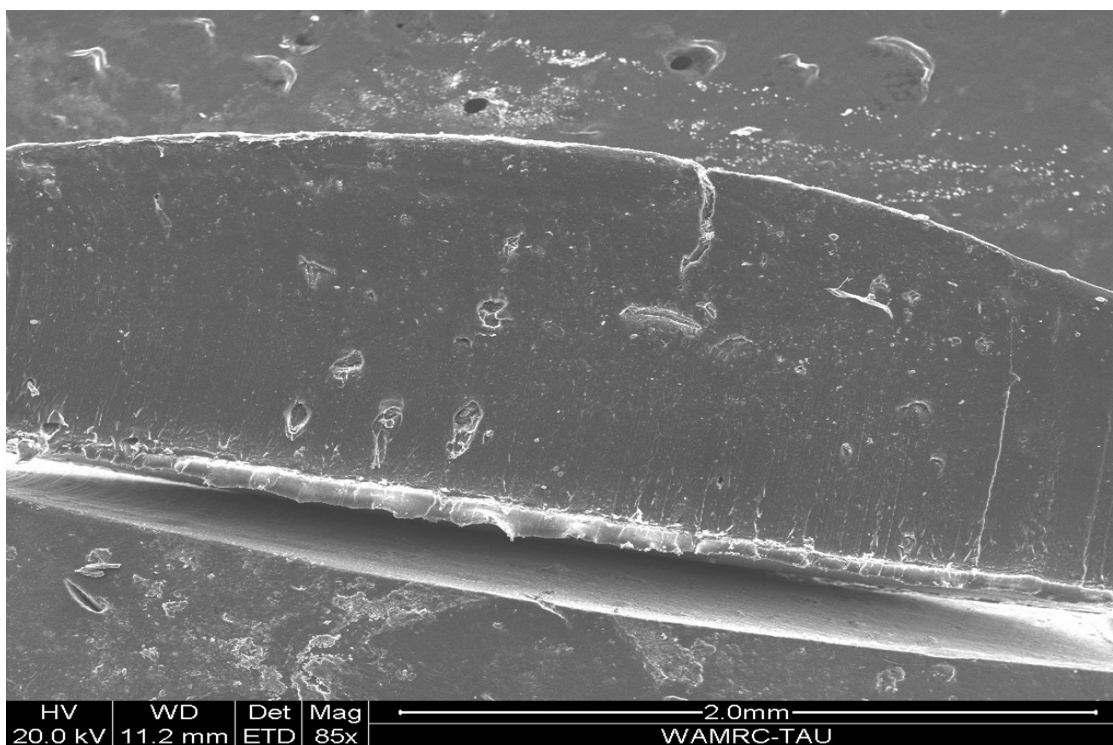

Figure S5 SEM image showing Side view of the pristine hydrogel
